# Supplementary material for: The epidemiologic and clinical features of suspected and confirmed cases of imported 2019 novel coronavirus pneumonia in north Shanghai, China
Source: PubMed Central journal article supplement — Ann Transl Med. 2020 May;8(10):637. doi: 10.21037/atm-20-2119 (PMC7290637; doi:10.21037/atm-20-2119), 2020-05
Supplement: atm-08-10-637-dss.pdf [file atm-08-10-637-dss.pdf]

## Data Sharing Statement

|                     |                                                                                                                                                    |                                                              |
|---------------------|----------------------------------------------------------------------------------------------------------------------------------------------------|--------------------------------------------------------------|
| <b>Article Info</b> | <a href="http://dx.doi.org/10.21037/atm-20-2119">http://dx.doi.org/10.21037/atm-20-2119</a>                                                        |                                                              |
| <b>Item</b>         | <b>Question</b>                                                                                                                                    | <b>Authors' Response<br/>( place “-” if not applicable )</b> |
| 1                   | Would you like to share data collected for your study to others?                                                                                   | yes                                                          |
| 2                   | If not, would you like to share the reason for your decision?                                                                                      |                                                              |
| 3                   | What data in particular will be shared?                                                                                                            | all                                                          |
| 4                   | Any other documents will be share? Such as study protocol, statistical analysis plan, informed consent form, clinical study report, analytic code. | yes                                                          |
| 5                   | When will data availability begin?                                                                                                                 | 2020.5.30                                                    |
| 6                   | When will data availability end?                                                                                                                   | 2020.12.30                                                   |
| 7                   | To whom will you share the data?                                                                                                                   | all                                                          |
| 8                   | For what type of analysis or purpose?                                                                                                              | study                                                        |
| 9                   | How or where can the data/documents be obtained?                                                                                                   | Collect email                                                |
| 10                  | Any other restrictions?                                                                                                                            | no                                                           |
